# Supplementary material
Source: Elsevier journal article supplement (https://www.sciencedirect.com/science/article/pii/S0213485313002971)
Supplement: mmc1 [file S0213485313002971:mmc1.pdf]

**CUESTIONARIO DE SÍNTOMAS NEUROTÓXICOS**  
**EUROQUEST**

Versión española

## **EUROQUEST**

### **INSTRUCCIONES PARA RELLENAR EL CUESTIONARIO**

Cuando rellene el cuestionario, utilice una regla para seguir el texto línea por línea.

**NÚMERO DE IDENTIFICACIÓN:**

**Fecha de nacimiento:**    ----    ----    ----

**Sexo:**

## TODA LA INFORMACIÓN QUE NOS FACILITE SERÁ CONFIDENCIAL

De vez en cuando, todos tenemos algunos trastornos. Este cuestionario trata de trastornos que quizá le resultarán familiares. Le pedimos que indique si ha tenido estos trastornos durante los últimos meses. Para ello marque con una X la casilla correspondiente.

Le invitamos a que responda a todas las preguntas.  
Para cada pregunta, tiene usted 4 respuestas posibles.  
Por ejemplo, para las primeras, las respuestas posibles son:

|                            |               |          |              |
|----------------------------|---------------|----------|--------------|
| Nunca o muy<br>pocas veces | Algunas veces | A menudo | Muy a menudo |
|----------------------------|---------------|----------|--------------|

Si ha tenido ese trastorno bastante a menudo, marque la casilla "A menudo" y así sucesivamente.

Si le cuesta elegir una respuesta, fíese de la primera respuesta que le venga a la mente

I DURANTE ESTOS ÚLTIMOS MESES, ¿CON QUÉ FRECUENCIA...  
(Marque una sola casilla por pregunta)

|                                                                                                 | Nunca o muy<br>pocas veces | Algunas<br>veces         | A<br>menudo              | Muy a<br>menudo          |
|-------------------------------------------------------------------------------------------------|----------------------------|--------------------------|--------------------------|--------------------------|
| 1/ ha dejado caer involuntariamente lo que tenía en las manos?                                  | <input type="checkbox"/>   | <input type="checkbox"/> | <input type="checkbox"/> | <input type="checkbox"/> |
| 2/ le ha faltado fuerza en los brazos y en las piernas?                                         | <input type="checkbox"/>   | <input type="checkbox"/> | <input type="checkbox"/> | <input type="checkbox"/> |
| 3/ ha notado una pérdida de sensibilidad en las manos y los pies?                               | <input type="checkbox"/>   | <input type="checkbox"/> | <input type="checkbox"/> | <input type="checkbox"/> |
| 4/ ha tenido una sensación de pesadez o de entumecimiento en los brazos o las piernas?          | <input type="checkbox"/>   | <input type="checkbox"/> | <input type="checkbox"/> | <input type="checkbox"/> |
| 5/ ha tenido picores (u hormigueo) en los brazos o las piernas?                                 | <input type="checkbox"/>   | <input type="checkbox"/> | <input type="checkbox"/> | <input type="checkbox"/> |
| 6/ ha tenido problemas de equilibrio?                                                           | <input type="checkbox"/>   | <input type="checkbox"/> | <input type="checkbox"/> | <input type="checkbox"/> |
| 7/ ha tenido la sensación de que las cosas no tienen el mismo sabor o el mismo olor de siempre? | <input type="checkbox"/>   | <input type="checkbox"/> | <input type="checkbox"/> | <input type="checkbox"/> |

Durante estos últimos meses ¿con qué frecuencia...

|                                                                         | Nunca o muy pocas veces  | Algunas veces            | A menudo                 | Muy a menudo             |
|-------------------------------------------------------------------------|--------------------------|--------------------------|--------------------------|--------------------------|
| 8/ ha tenido la sensación de tener la piel de la cara dormida?          | <input type="checkbox"/> | <input type="checkbox"/> | <input type="checkbox"/> | <input type="checkbox"/> |
| 9/ ha tenido dificultad para controlar los movimientos de las manos?    | <input type="checkbox"/> | <input type="checkbox"/> | <input type="checkbox"/> | <input type="checkbox"/> |
| 10/ ha notado lentitud en lo que suele hacer?                           | <input type="checkbox"/> | <input type="checkbox"/> | <input type="checkbox"/> | <input type="checkbox"/> |
| 11/ le han temblado las manos?                                          | <input type="checkbox"/> | <input type="checkbox"/> | <input type="checkbox"/> | <input type="checkbox"/> |
| 12/ ha tenido dolor de cabeza?                                          | <input type="checkbox"/> | <input type="checkbox"/> | <input type="checkbox"/> | <input type="checkbox"/> |
| 13/ ha sudado sin motivo?                                               | <input type="checkbox"/> | <input type="checkbox"/> | <input type="checkbox"/> | <input type="checkbox"/> |
| 14/ ha tenido náuseas (mareos)?                                         | <input type="checkbox"/> | <input type="checkbox"/> | <input type="checkbox"/> | <input type="checkbox"/> |
| 15/ ha tenido dolor de barriga?                                         | <input type="checkbox"/> | <input type="checkbox"/> | <input type="checkbox"/> | <input type="checkbox"/> |
| 16/ ha tenido vértigos?                                                 | <input type="checkbox"/> | <input type="checkbox"/> | <input type="checkbox"/> | <input type="checkbox"/> |
| 17/ se ha quedado sin aliento sin haber hecho esfuerzos físicos?        | <input type="checkbox"/> | <input type="checkbox"/> | <input type="checkbox"/> | <input type="checkbox"/> |
| 18/ ha tenido palpitaciones (en el corazón)?                            | <input type="checkbox"/> | <input type="checkbox"/> | <input type="checkbox"/> | <input type="checkbox"/> |
| 19/ ha tenido zumbidos (o silbidos) en los oídos?                       | <input type="checkbox"/> | <input type="checkbox"/> | <input type="checkbox"/> | <input type="checkbox"/> |
| 20/ ha tenido una sensación de gran cansancio?                          | <input type="checkbox"/> | <input type="checkbox"/> | <input type="checkbox"/> | <input type="checkbox"/> |
| 21/ ha notado falta de deseo sexual?                                    | <input type="checkbox"/> | <input type="checkbox"/> | <input type="checkbox"/> | <input type="checkbox"/> |
| 22/ le ha costado tolerar el alcohol, en el caso en que lo haya tomado? | <input type="checkbox"/> | <input type="checkbox"/> | <input type="checkbox"/> | <input type="checkbox"/> |

Durante estos últimos meses ¿con qué frecuencia...

|                                                                         | Nunca o muy pocas veces  | Algunas veces            | A menudo                 | Muy a menudo             |
|-------------------------------------------------------------------------|--------------------------|--------------------------|--------------------------|--------------------------|
| 23/ ha tenido diarreas?                                                 | <input type="checkbox"/> | <input type="checkbox"/> | <input type="checkbox"/> | <input type="checkbox"/> |
| 24/ ha tenido estreñimiento?                                            | <input type="checkbox"/> | <input type="checkbox"/> | <input type="checkbox"/> | <input type="checkbox"/> |
| 25/ ha tenido falta de apetito?                                         | <input type="checkbox"/> | <input type="checkbox"/> | <input type="checkbox"/> | <input type="checkbox"/> |
| 26/ ha tenido la sensación de tener la cabeza aprisionada o comprimida? | <input type="checkbox"/> | <input type="checkbox"/> | <input type="checkbox"/> | <input type="checkbox"/> |

II DURANTE ESTOS ÚLTIMOS MESES, DURANTE Y DESPUÉS DEL TRABAJO, ¿CON QUÉ FRECUENCIA HA TENIDO...

(Marque una sola casilla por pregunta)

|                                                                           | Nunca o muy pocas veces  | Algunas veces            | A menudo                 | Muy a menudo             |
|---------------------------------------------------------------------------|--------------------------|--------------------------|--------------------------|--------------------------|
| 1/ los ojos irritados (rojos, con picor y llorosos?                       | <input type="checkbox"/> | <input type="checkbox"/> | <input type="checkbox"/> | <input type="checkbox"/> |
| 2/ la sensación de estar ebrio/a (o borracho/a) sin haber bebido alcohol? | <input type="checkbox"/> | <input type="checkbox"/> | <input type="checkbox"/> | <input type="checkbox"/> |
| 3/ la boca o la garganta seca?                                            | <input type="checkbox"/> | <input type="checkbox"/> | <input type="checkbox"/> | <input type="checkbox"/> |
| 4/ la garganta irritada (con ganas de toser todo el rato)?                | <input type="checkbox"/> | <input type="checkbox"/> | <input type="checkbox"/> | <input type="checkbox"/> |
| 5/ la nariz que goteaba?                                                  | <input type="checkbox"/> | <input type="checkbox"/> | <input type="checkbox"/> | <input type="checkbox"/> |
| 6/ un mal sabor de boca?                                                  | <input type="checkbox"/> | <input type="checkbox"/> | <input type="checkbox"/> | <input type="checkbox"/> |

### III DURANTE ESTOS ÚLTIMOS MESES, ¿CON QUÉ FRECUENCIA...

(Marque una sola casilla por pregunta)

|                                                                                                 | Nunca o muy pocas veces  | Algunas veces            | A menudo                 | Muy a menudo             |
|-------------------------------------------------------------------------------------------------|--------------------------|--------------------------|--------------------------|--------------------------|
| 1/ ha tenido dificultad para ponerse a trabajar?                                                | <input type="checkbox"/> | <input type="checkbox"/> | <input type="checkbox"/> | <input type="checkbox"/> |
| 2/ ha tenido la sensación de tener los nervios de punta?                                        | <input type="checkbox"/> | <input type="checkbox"/> | <input type="checkbox"/> | <input type="checkbox"/> |
| 3/ ha tenido momentos de "depre"?                                                               | <input type="checkbox"/> | <input type="checkbox"/> | <input type="checkbox"/> | <input type="checkbox"/> |
| 4/ se ha sentido impaciente?                                                                    | <input type="checkbox"/> | <input type="checkbox"/> | <input type="checkbox"/> | <input type="checkbox"/> |
| 5/ se ha sentido contrariado/a por cosas sin importancia?                                       | <input type="checkbox"/> | <input type="checkbox"/> | <input type="checkbox"/> | <input type="checkbox"/> |
| 6/ le ha costado estarse quieto/a?                                                              | <input type="checkbox"/> | <input type="checkbox"/> | <input type="checkbox"/> | <input type="checkbox"/> |
| 7/ ha tenido cambios bruscos de humor?                                                          | <input type="checkbox"/> | <input type="checkbox"/> | <input type="checkbox"/> | <input type="checkbox"/> |
| 8/ ha sentido falta de interés por lo que le rodea? (sentimiento de indiferencia o de desapego) | <input type="checkbox"/> | <input type="checkbox"/> | <input type="checkbox"/> | <input type="checkbox"/> |
| 9/ ha notado falta de ánimo?                                                                    | <input type="checkbox"/> | <input type="checkbox"/> | <input type="checkbox"/> | <input type="checkbox"/> |
| 10/ ha sentido falta de interés por las actividades que le relacionan con los demás?            | <input type="checkbox"/> | <input type="checkbox"/> | <input type="checkbox"/> | <input type="checkbox"/> |
| 11/ ha tenido dificultad para contener su cólera?                                               | <input type="checkbox"/> | <input type="checkbox"/> | <input type="checkbox"/> | <input type="checkbox"/> |
| 12/ ha tenido tendencia a olvidar cosas?                                                        | <input type="checkbox"/> | <input type="checkbox"/> | <input type="checkbox"/> | <input type="checkbox"/> |
| 13/ ha tenido la necesidad de anotar las cosas para recordarlas?                                | <input type="checkbox"/> | <input type="checkbox"/> | <input type="checkbox"/> | <input type="checkbox"/> |
| 14/ ha tenido tendencia a olvidar lo que quería decir o hacer en la vida diaria?                | <input type="checkbox"/> | <input type="checkbox"/> | <input type="checkbox"/> | <input type="checkbox"/> |

Durante estos últimos meses, ¿con qué frecuencia...

|                                                                                     | Nunca o muy pocas veces  | Algunas veces            | A menudo                 | Muy a menudo             |
|-------------------------------------------------------------------------------------|--------------------------|--------------------------|--------------------------|--------------------------|
| 15/ le ha costado concentrarse?                                                     | <input type="checkbox"/> | <input type="checkbox"/> | <input type="checkbox"/> | <input type="checkbox"/> |
| 16/ ha tenido tendencia a perderse en sus pensamientos (a soñar)?                   | <input type="checkbox"/> | <input type="checkbox"/> | <input type="checkbox"/> | <input type="checkbox"/> |
| 17/ ha tenido la mente confusa cuando había que concentrarse?                       | <input type="checkbox"/> | <input type="checkbox"/> | <input type="checkbox"/> | <input type="checkbox"/> |
| 18/ le ha costado acordarse de nombres y fechas?                                    | <input type="checkbox"/> | <input type="checkbox"/> | <input type="checkbox"/> | <input type="checkbox"/> |
| 19/ ha tenido tendencia a estar distraído/a, a estar en la luna?                    | <input type="checkbox"/> | <input type="checkbox"/> | <input type="checkbox"/> | <input type="checkbox"/> |
| 20/ ha tenido dificultad para recordar lo que había leído o visto en la televisión? | <input type="checkbox"/> | <input type="checkbox"/> | <input type="checkbox"/> | <input type="checkbox"/> |
| 21/ ha oído decir que estaba perdiendo la memoria?                                  | <input type="checkbox"/> | <input type="checkbox"/> | <input type="checkbox"/> | <input type="checkbox"/> |
| 22/ ha tenido tendencia a dormirse cuando no era el momento?                        | <input type="checkbox"/> | <input type="checkbox"/> | <input type="checkbox"/> | <input type="checkbox"/> |
| 23/ se ha sentido excesiva o anormalmente cansado/a por la noche?                   | <input type="checkbox"/> | <input type="checkbox"/> | <input type="checkbox"/> | <input type="checkbox"/> |
| 24/ ha tenido ganas de dormir durante el día? (somnolencia)                         | <input type="checkbox"/> | <input type="checkbox"/> | <input type="checkbox"/> | <input type="checkbox"/> |
| 25/ se ha sentido cansado/a al despertarse?                                         | <input type="checkbox"/> | <input type="checkbox"/> | <input type="checkbox"/> | <input type="checkbox"/> |
| 26/ ha sentido falta de energía?                                                    | <input type="checkbox"/> | <input type="checkbox"/> | <input type="checkbox"/> | <input type="checkbox"/> |
| 27/ ha sentido cansancio o fatiga general?                                          | <input type="checkbox"/> | <input type="checkbox"/> | <input type="checkbox"/> | <input type="checkbox"/> |
| 28/ ha necesitado dormir más que antes?                                             | <input type="checkbox"/> | <input type="checkbox"/> | <input type="checkbox"/> | <input type="checkbox"/> |

|                                                  | Nunca o muy pocas veces  | Algunas veces            | A Menudo                 | Muy a menudo             |
|--------------------------------------------------|--------------------------|--------------------------|--------------------------|--------------------------|
| 29/ ha tenido problemas para dormirse?           | <input type="checkbox"/> | <input type="checkbox"/> | <input type="checkbox"/> | <input type="checkbox"/> |
| 30/ se ha despertado sin razón durante el sueño? | <input type="checkbox"/> | <input type="checkbox"/> | <input type="checkbox"/> | <input type="checkbox"/> |
| 31/ se ha despertado demasiado temprano?         | <input type="checkbox"/> | <input type="checkbox"/> | <input type="checkbox"/> | <input type="checkbox"/> |
| 32/ ha tenido pesadillas?                        | <input type="checkbox"/> | <input type="checkbox"/> | <input type="checkbox"/> | <input type="checkbox"/> |

IV AHORA, EN RELACION A COMO ES DE SENSIBLE FRENTE A DETERMINADAS COSAS DE SU ENTORNO ¿PUEDE INDICAR HASTA QUÉ PUNTO ESTÁ DE ACUERDO O NO CON LAS FRASES SIGUIENTES? PARA ELLO UTILICE LAS 4 POSIBILIDADES DE RESPUESTA.

*(Marque una sola casilla por pregunta)*

EN GENERAL SOY SENSIBLE A:

|                                                            | Totalmente en desacuerdo | En desacuerdo            | De acuerdo               | Totalmente de acuerdo    |
|------------------------------------------------------------|--------------------------|--------------------------|--------------------------|--------------------------|
| 1/ las luces brillantes.                                   | <input type="checkbox"/> | <input type="checkbox"/> | <input type="checkbox"/> | <input type="checkbox"/> |
| 2/ el ruido del tráfico, la música y otros ruidos fuertes. | <input type="checkbox"/> | <input type="checkbox"/> | <input type="checkbox"/> | <input type="checkbox"/> |
| 3/ los olores fuertes.                                     | <input type="checkbox"/> | <input type="checkbox"/> | <input type="checkbox"/> | <input type="checkbox"/> |
| 4/ tejidos ásperos en contacto con mi piel.                | <input type="checkbox"/> | <input type="checkbox"/> | <input type="checkbox"/> | <input type="checkbox"/> |
| 5/ el calor.                                               | <input type="checkbox"/> | <input type="checkbox"/> | <input type="checkbox"/> | <input type="checkbox"/> |
| 6/ el frío.                                                | <input type="checkbox"/> | <input type="checkbox"/> | <input type="checkbox"/> | <input type="checkbox"/> |
| 7/ el humo del tabaco.                                     | <input type="checkbox"/> | <input type="checkbox"/> | <input type="checkbox"/> | <input type="checkbox"/> |
| 8/ algunos alimentos.                                      | <input type="checkbox"/> | <input type="checkbox"/> | <input type="checkbox"/> | <input type="checkbox"/> |



V AHORA, ¿PUEDE INDICAR HASTA QUÉ PUNTO ESTÁ DE ACUERDO O NO CON LAS FRASES SIGUIENTES? PARA ELLO UTILICE LAS 4 POSIBILIDADES DE RESPUESTA.

*(Marque una sola casilla por pregunta)*

|                                                                                                   | Totalmente<br>en<br>desacuerdo | En<br>desacuerdo         | De<br>acuerdo            | Totalmente<br>de acuerdo |
|---------------------------------------------------------------------------------------------------|--------------------------------|--------------------------|--------------------------|--------------------------|
| 1/ en general, soy una persona inquieta.                                                          | <input type="checkbox"/>       | <input type="checkbox"/> | <input type="checkbox"/> | <input type="checkbox"/> |
| 2/ me cuesta más que a los demás superar mis dificultades.                                        | <input type="checkbox"/>       | <input type="checkbox"/> | <input type="checkbox"/> | <input type="checkbox"/> |
| 3/ me preocupa mucho por cosas sin importancia.                                                   | <input type="checkbox"/>       | <input type="checkbox"/> | <input type="checkbox"/> | <input type="checkbox"/> |
| 4/ con frecuencia tengo la sensación de que, en cualquier momento, puede ocurrirme una desgracia. | <input type="checkbox"/>       | <input type="checkbox"/> | <input type="checkbox"/> | <input type="checkbox"/> |
| 5/ con frecuencia estoy desbordado/a por cosas sin importancia.                                   | <input type="checkbox"/>       | <input type="checkbox"/> | <input type="checkbox"/> | <input type="checkbox"/> |
| 6/ en general, me falta confianza en mí.                                                          | <input type="checkbox"/>       | <input type="checkbox"/> | <input type="checkbox"/> | <input type="checkbox"/> |

VI PARA TERMINAR, ¿PODRÍA RESPONDER A ESTAS 4 PREGUNTAS?

*(Marque una sola casilla por pregunta)*

1/ ¿Cómo calificaría su estado de salud?

|                          |                          |                          |                          |
|--------------------------|--------------------------|--------------------------|--------------------------|
| Muy bueno                | Bueno                    | Malo                     | Muy malo                 |
| <input type="checkbox"/> | <input type="checkbox"/> | <input type="checkbox"/> | <input type="checkbox"/> |

2/ Y si lo compara con su estado de salud de hace 5 años, diría que hoy es:

|                          |                          |                          |                          |
|--------------------------|--------------------------|--------------------------|--------------------------|
| Mejor                    | Más o menos igual        | Peor                     | Mucho peor               |
| <input type="checkbox"/> | <input type="checkbox"/> | <input type="checkbox"/> | <input type="checkbox"/> |

3/ Actualmente, ¿cómo encuentra la vida en general?

| Buena                    | Bastante buena           | No muy buena             | Mala                     |
|--------------------------|--------------------------|--------------------------|--------------------------|
| <input type="checkbox"/> | <input type="checkbox"/> | <input type="checkbox"/> | <input type="checkbox"/> |

4/ Y si la compara con su vida de hace 5 años, diría que hoy es:

| Mucho mejor              | Más o menos igual        | Peor                     | Mucho peor               |
|--------------------------|--------------------------|--------------------------|--------------------------|
| <input type="checkbox"/> | <input type="checkbox"/> | <input type="checkbox"/> | <input type="checkbox"/> |

MUCHAS GRACIAS POR HABER CONTESTADO ESTE CUESTIONARIO
